# Supplementary material
Source: PubMed Central journal article supplement (PMC7173146)

Supplemental Fig1.

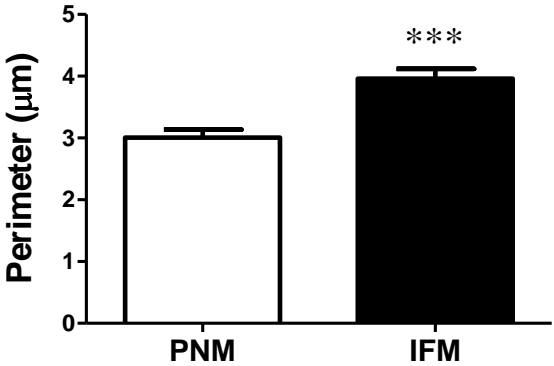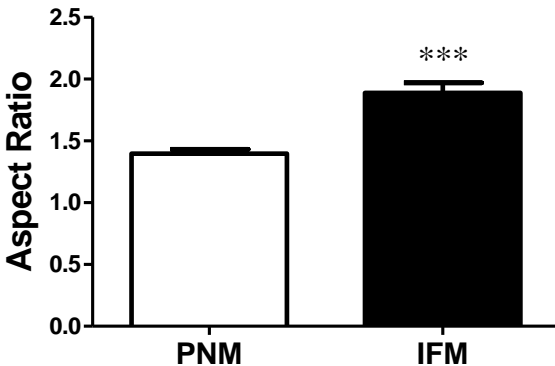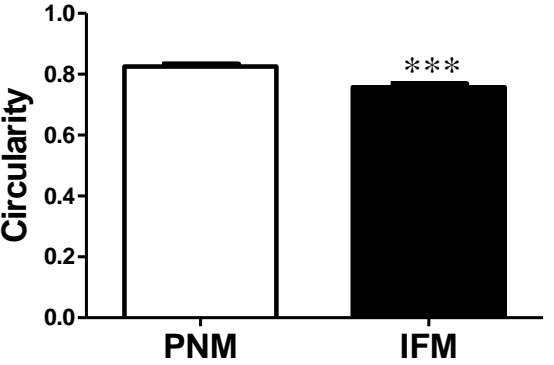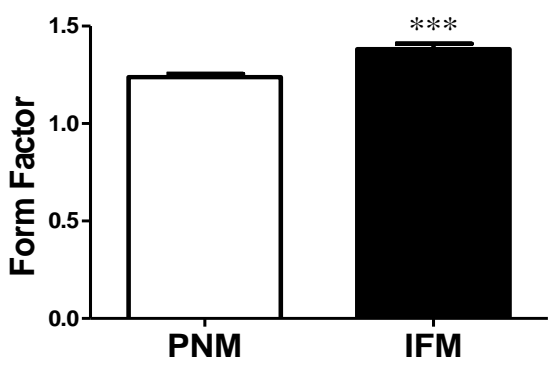

# Supplemental Fig2.

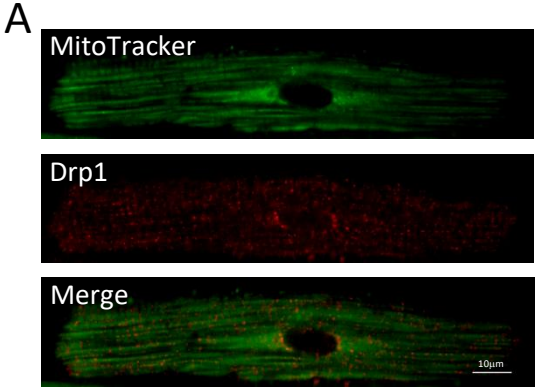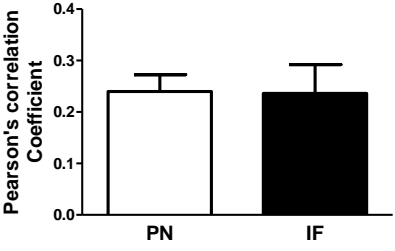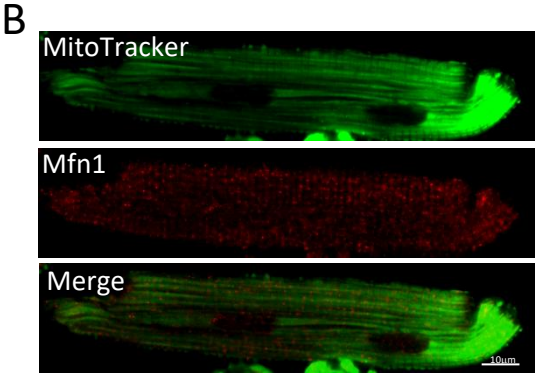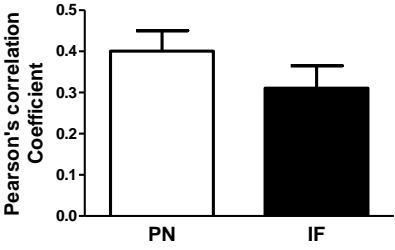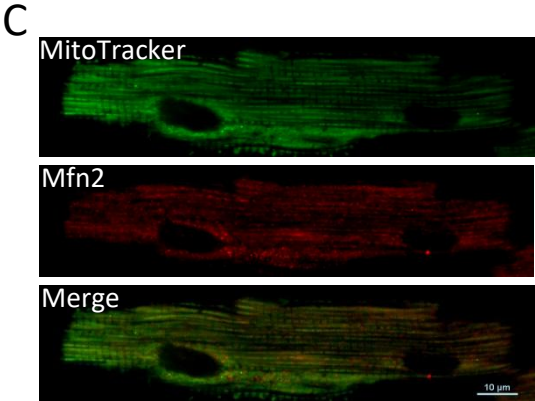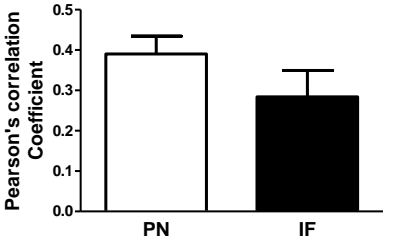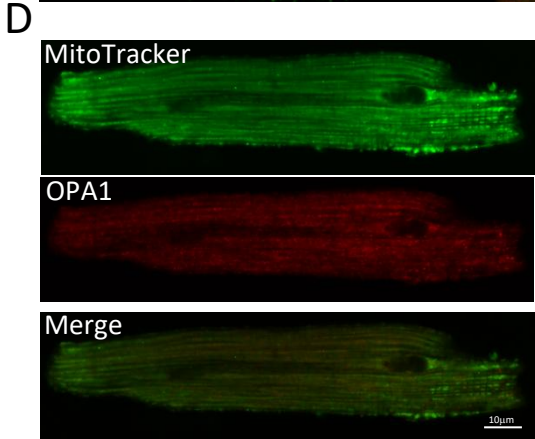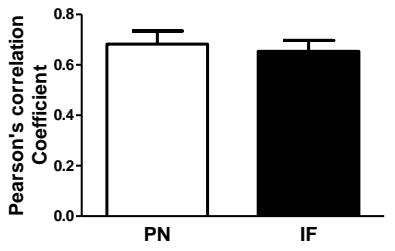

Supplement: NIHMS1562257-supplement-1.pdf [file NIHMS1562257-supplement-1.pdf]
